# Supplementary material for: A Study of Population Size and Activity Patterns and Their Relationship to the Prey Species of the Eurasian Lynx Using a Camera Trapping Approach
Source: MDPI journal article supplement (doi:10.3390/ani9110864), 2019-10-25
Supplement: s1 [file s1]

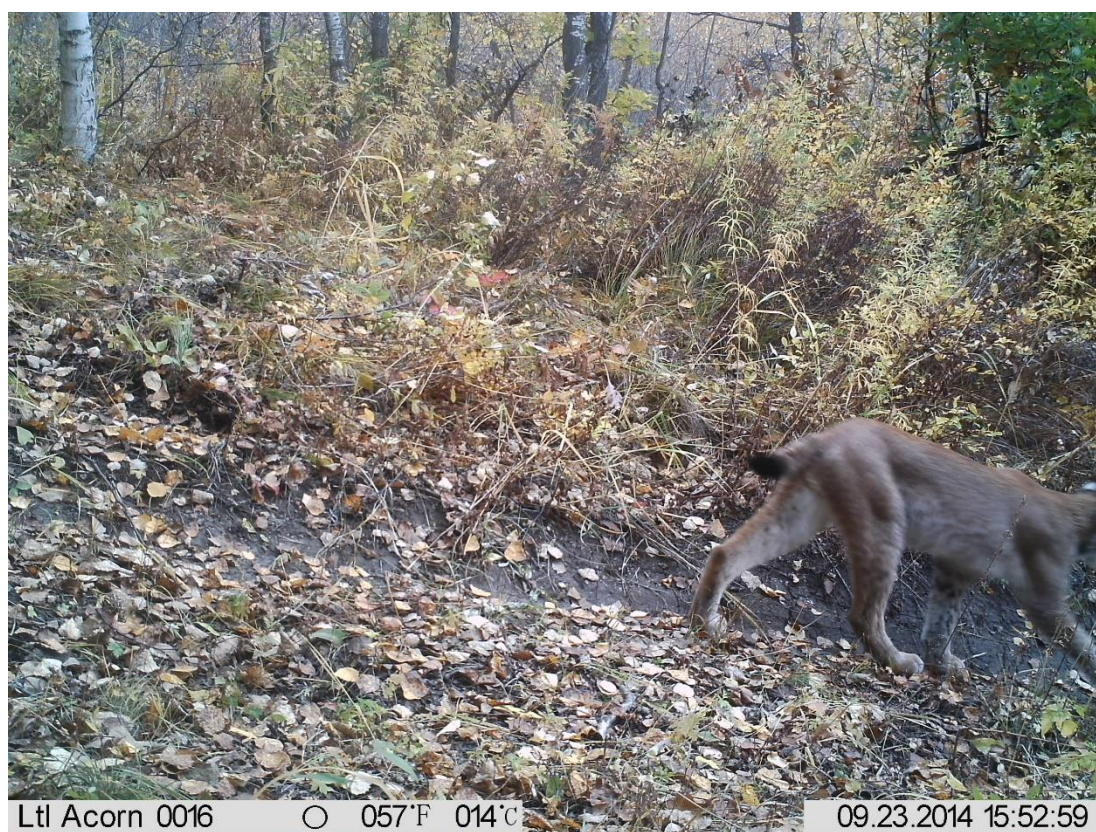

(a)

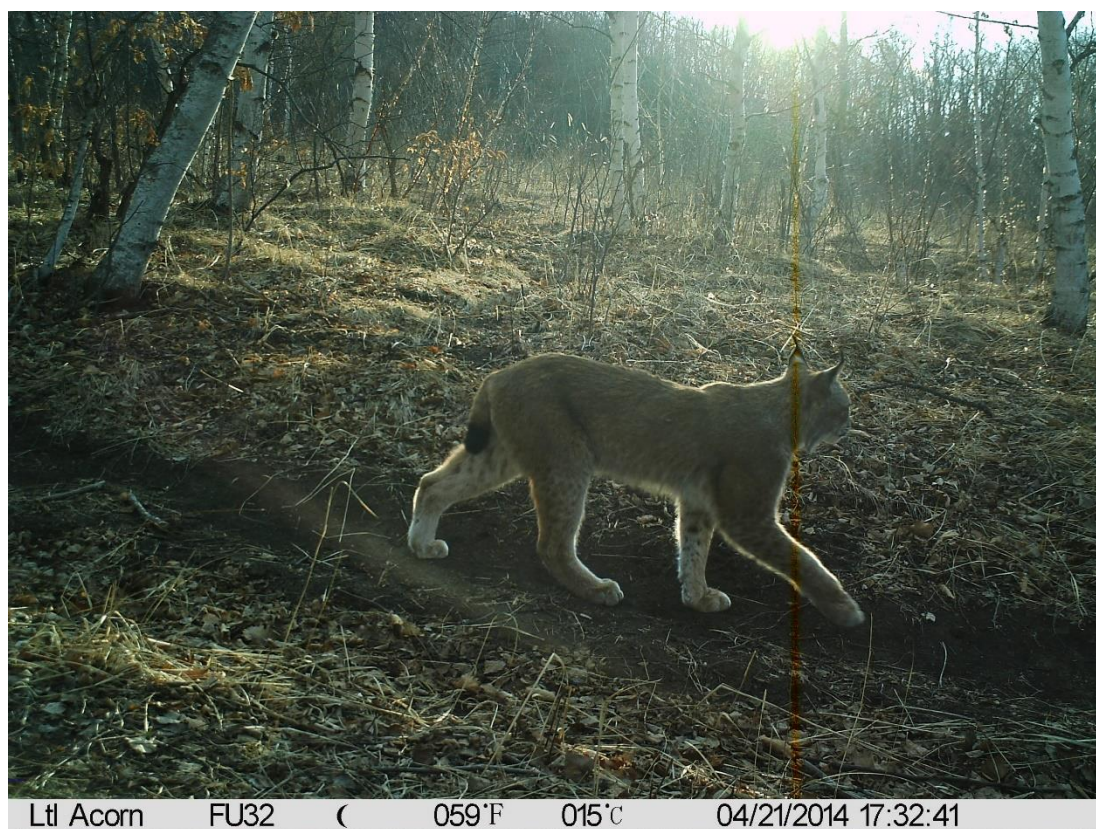

(b)

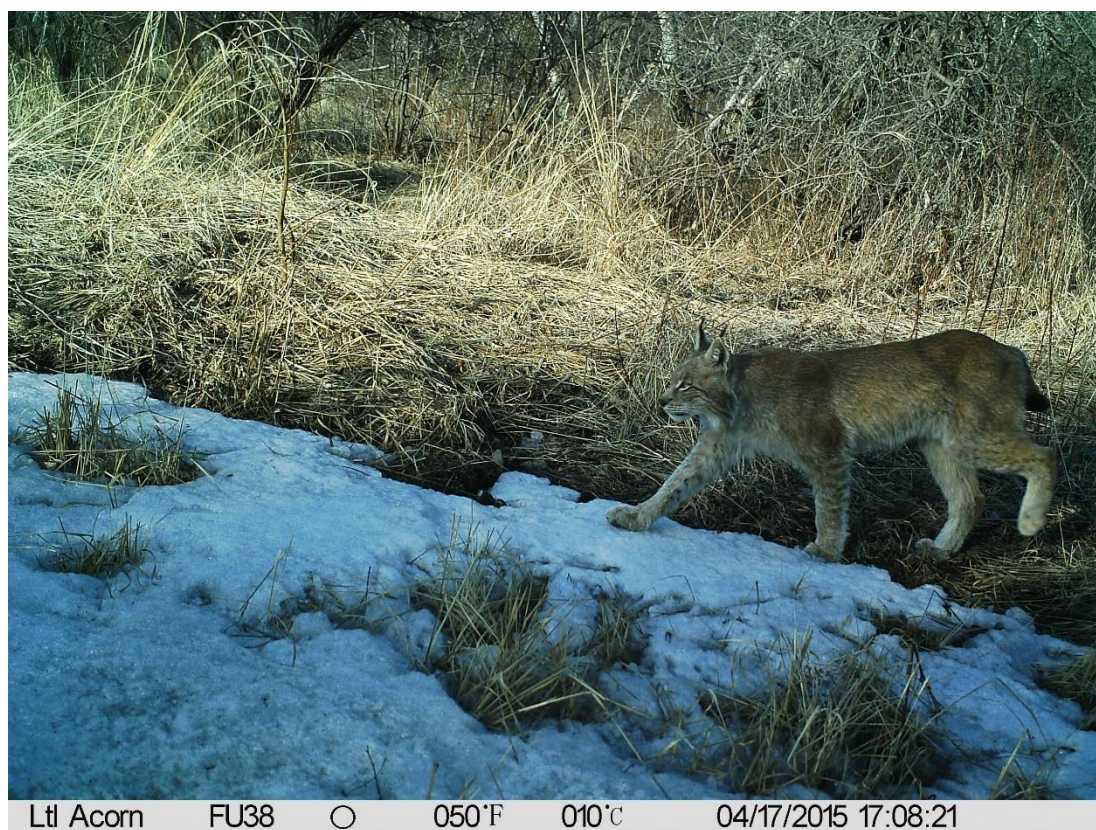

(c)

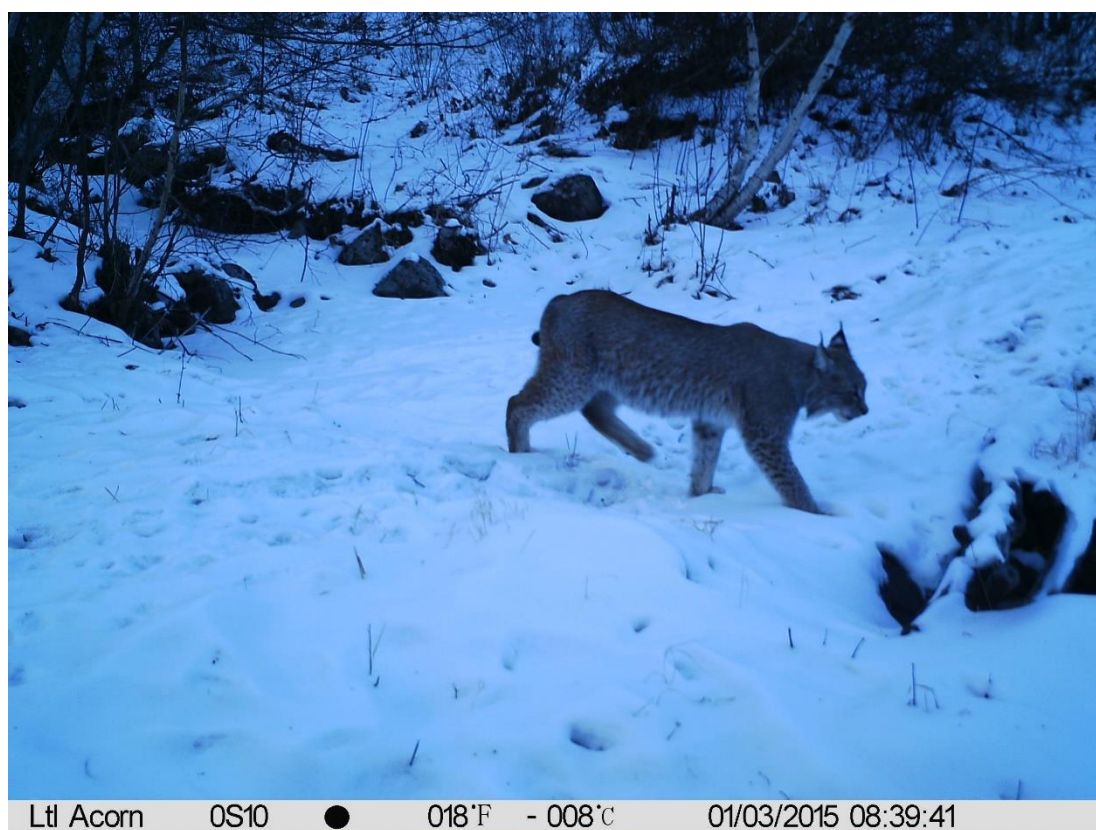

(d)

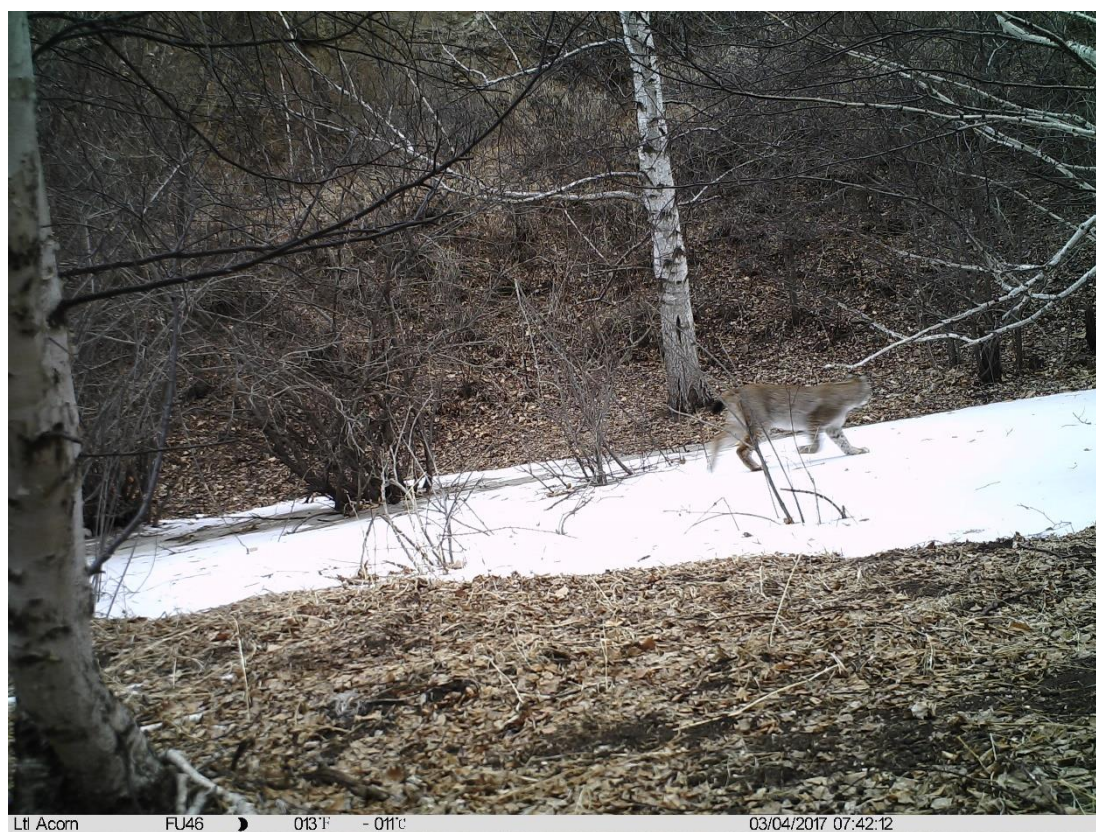

(e)

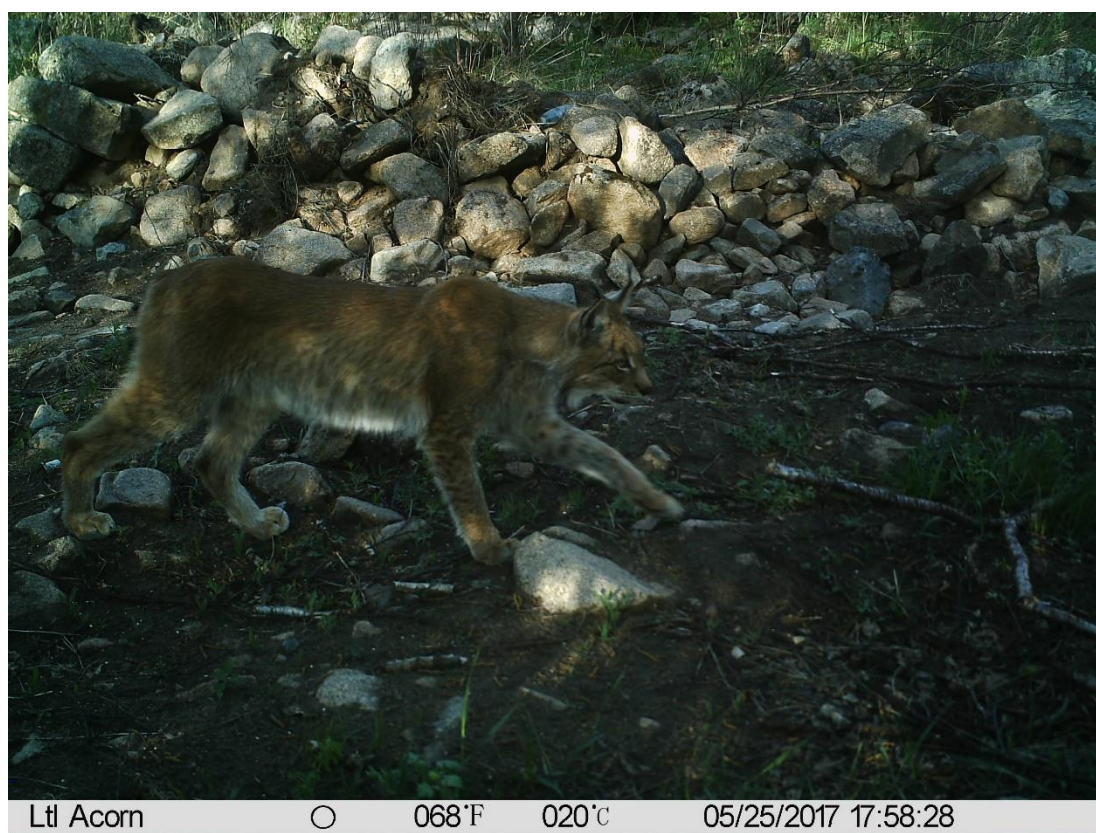

(f)

**Figure S1.** Six photos showing the inner side of forelimbs. (a) Two black dots on left forelimb; (b) One bigger black dot on left forelimb; (c) No obvious dot on right forelimb; (d) Three heavy black dots on left forelimb; (e) “V” type black mark on left forelimb; (f) Three light black dots on left forelimb.
